# Supplementary material
Source: PubMed Central journal article supplement (PMC7462348)
Supplement: NIHMS1604849-supplement-1604849_Sup_Fig_1.pdf [file NIHMS1604849-supplement-1604849_Sup_Fig_1.pdf]

# Supplemental Figure 1

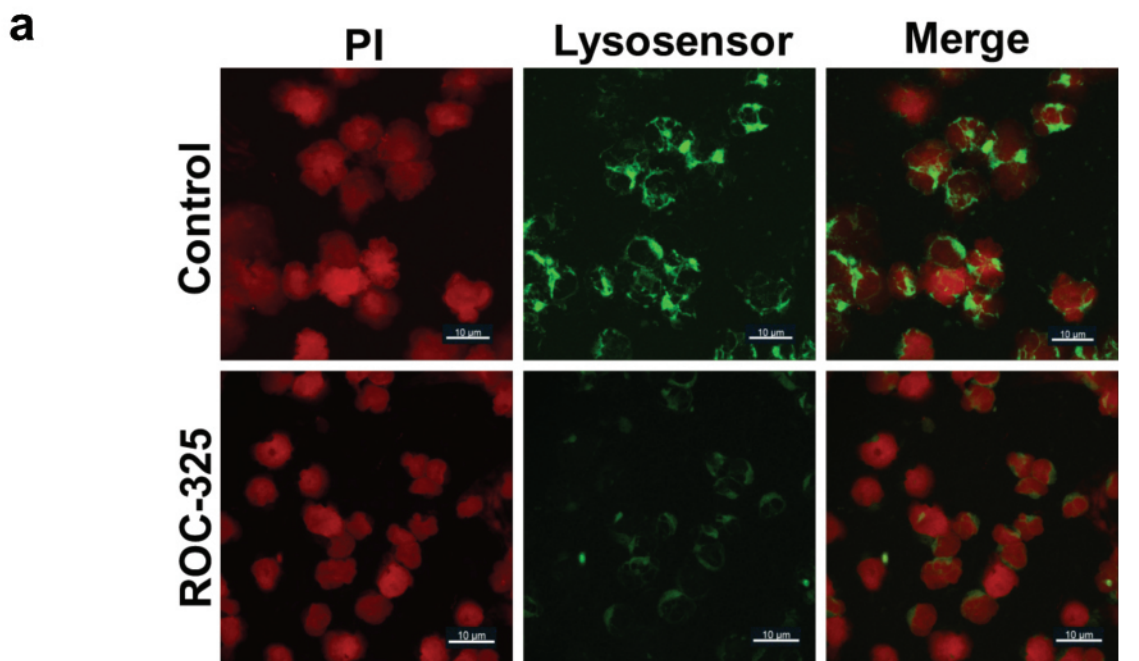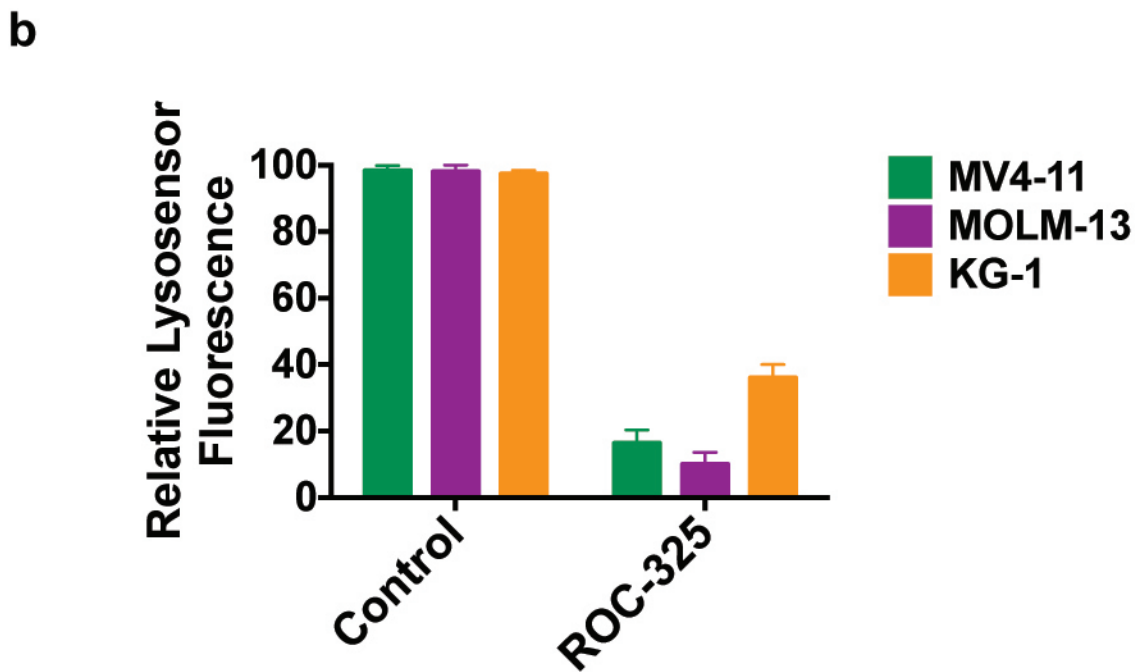

**Supplemental Figure 1. ROC-325 promotes lysosomal deacidification. (a-b)** Drug-induced lysosomal deacidification. Cells were treated with ROC-325 for 6 h. Lysosomal acidity was quantified by Lysosensor Green staining followed by flow cytometry. N = 3 ± SD.
