# Supplementary material
Source: PubMed Central journal article supplement (PMC7462348)
Supplement: NIHMS1604849-supplement-1604849_Sup_Fig_2.pdf [file NIHMS1604849-supplement-1604849_Sup_Fig_2.pdf]

# Supplemental Figure 2

a

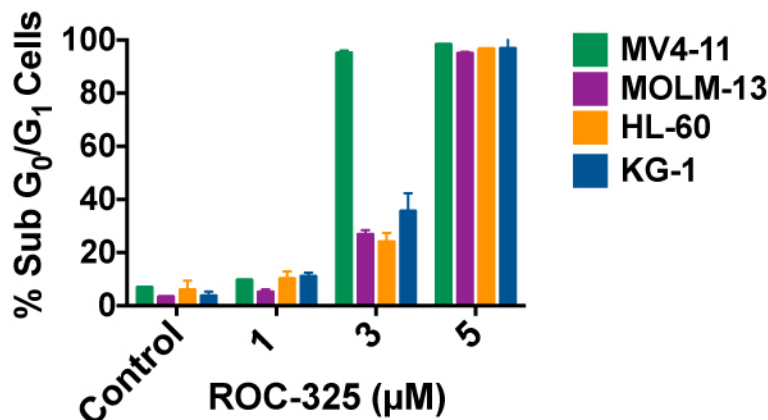

b

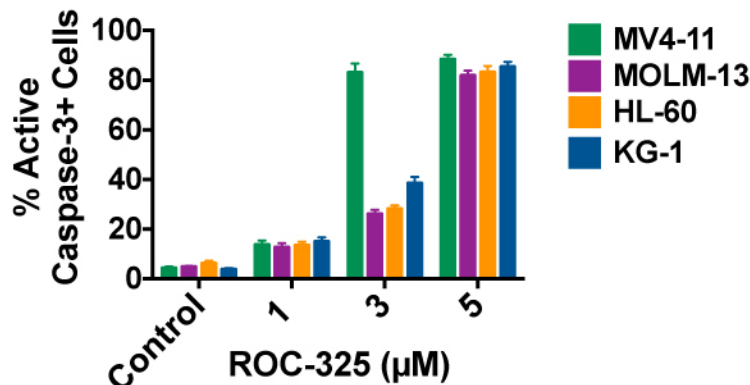

c

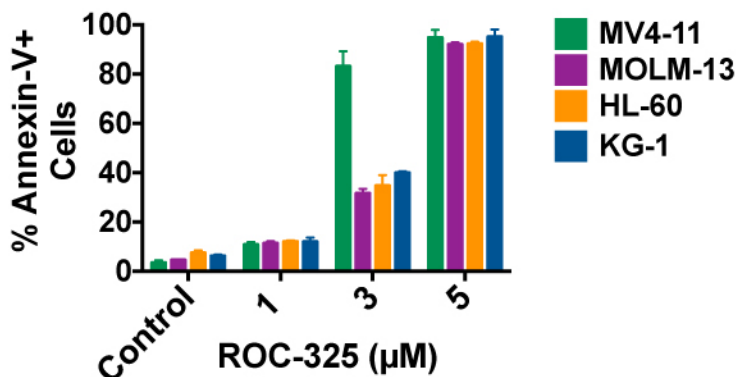

**Supplemental Figure 2. ROC-325 stimulates apoptosis.** (a-c) ROC-325 induces dose-dependent apoptosis. Cells were treated with the indicated concentrations of ROC-325 for 48 h. Apoptosis was measured by: (a) PI/FACS, (b) active caspase-3 staining followed by FACS and (c) Annexin-V FITC staining followed by FACS. N = 3 ± SD.
