# Supplementary material
Source: PubMed Central journal article supplement (PMC7462348)
Supplement: NIHMS1604849-supplement-1604849_Sup_Fig_4.pdf [file NIHMS1604849-supplement-1604849_Sup_Fig_4.pdf]

# Supplemental Figure 4

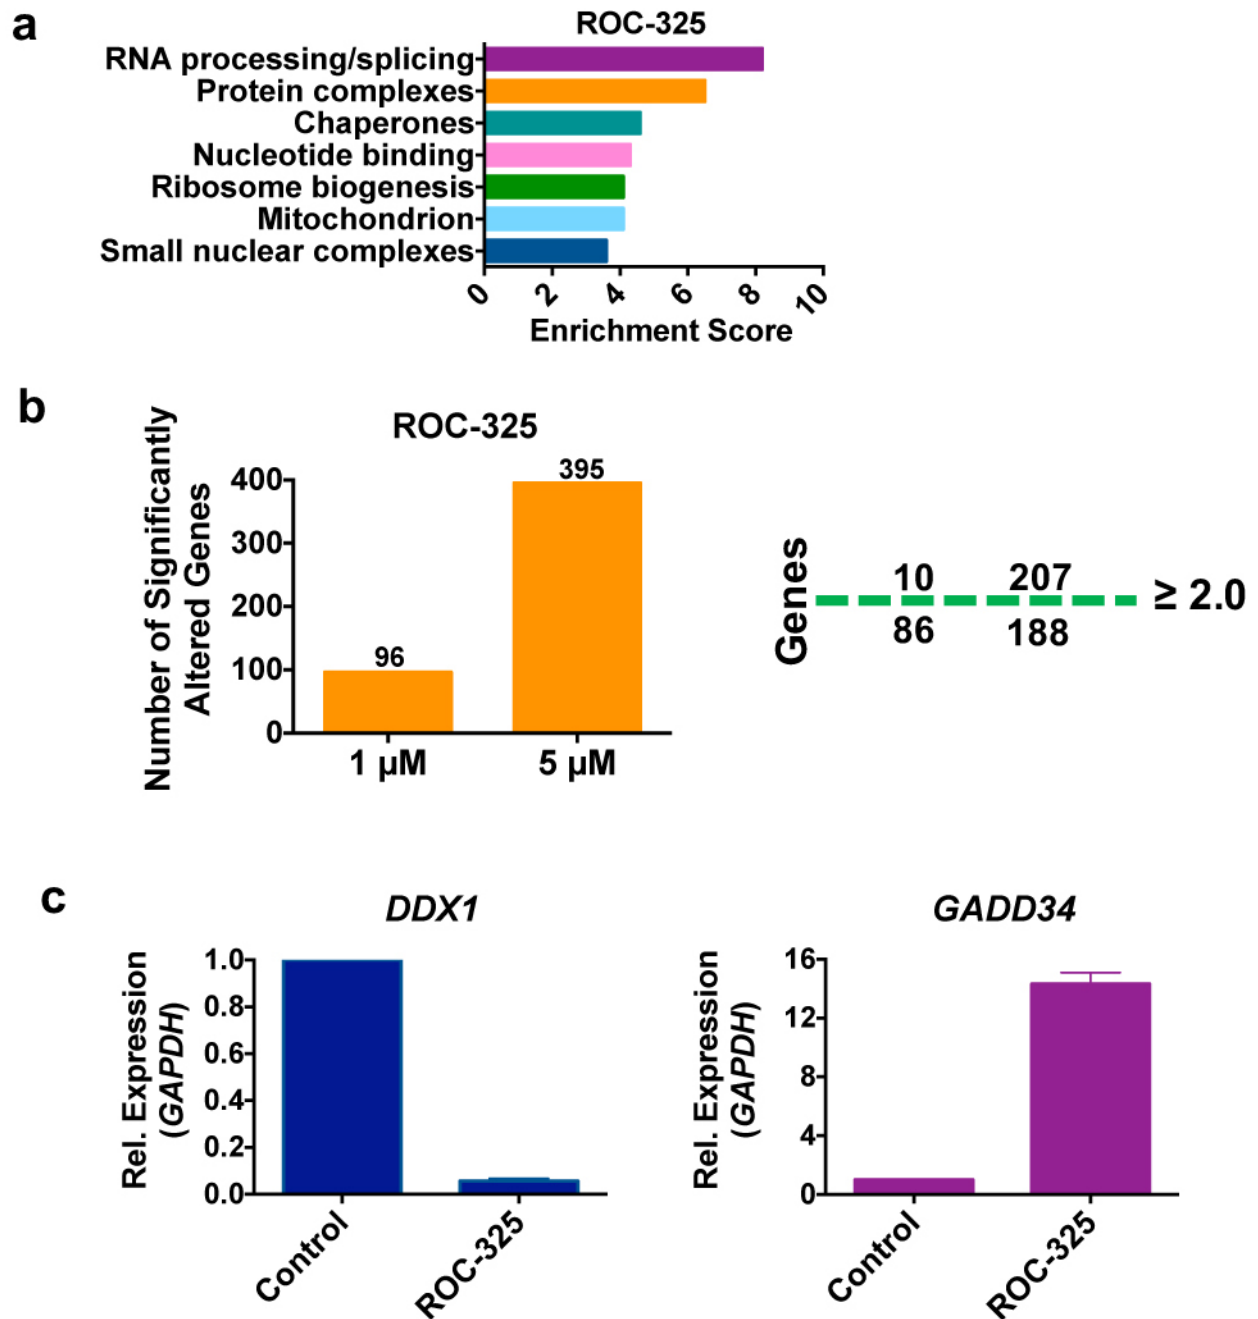

**Supplemental Figure 4. Transcriptome analysis of the effects of ROC-325.** (a) Effects of drug treatment on major pathways. RNASeq was conducted on MV4-11 AML cells treated with ROC-325 as described in the Materials and Methods. Pathway enrichment is shown. RNA processing/splicing;  $P = 2.22 \times 10^{-16}$ ,  $Q = 0.032$ ; Protein complexes:  $P = 1.82 \times 10^{-8}$ ,  $Q = 0.011$ ; Chaperones:  $P = 2.55 \times 10^{-8}$ ,  $Q = 0.046$ ; Nucleotide binding:  $P = 1.06 \times 10^{-6}$ ,  $Q = 0.002$ ; Ribosome biogenesis;  $P = 9.64 \times 10^{-12}$ ,  $Q = 0.023$ ; Mitochondrion:  $P = 3.34 \times 10^{-9}$ ,  $Q = 0.033$ ; Small nuclear complexes:  $P = 3.45 \times 10^{-7}$ ,  $Q = 0.025$ . (b) Quantification of ROC-325 induced gene expression changes. Left, the number of significantly altered genes for each treatment group. Right, Breakdown of the number of genes significantly upregulated and downregulated for each treatment group. (c) Selected qRT-PCR validation of RNASeq results. Two representative genes are shown: *DDX1* (significantly downregulated) and *GADD34* (significantly upregulated).
