# Supplementary material
Source: PubMed Central journal article supplement (PMC7462348)
Supplement: NIHMS1604849-supplement-1604849_Sup_Fig_6.pdf [file NIHMS1604849-supplement-1604849_Sup_Fig_6.pdf]

## Supplemental Figure 6

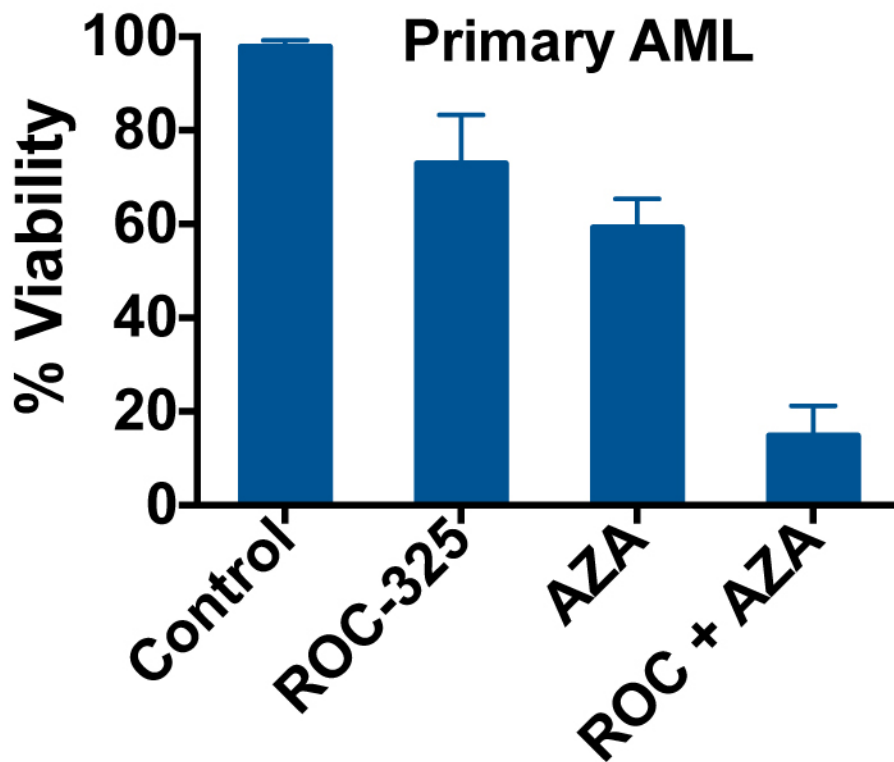

**Supplemental Figure 6. Effects of ROC-325 and azacitidine on the viability of primary AML cells.** Primary blasts were treated with 1  $\mu$ M ROC-325, 2  $\mu$ M azacitidine, or both drugs for 72 h. Cell viability was determined by MTT assay, N = 5  $\pm$  SD.
