# Supplementary material
Source: PubMed Central journal article supplement (PMC7462348)
Supplement: NIHMS1604849-supplement-1604849_Sup_Fig_7.pdf [file NIHMS1604849-supplement-1604849_Sup_Fig_7.pdf]

# Supplemental Figure 7

a

Vehicle

ROC-325

Azacitidine

ROC-325 + Aza

CD45

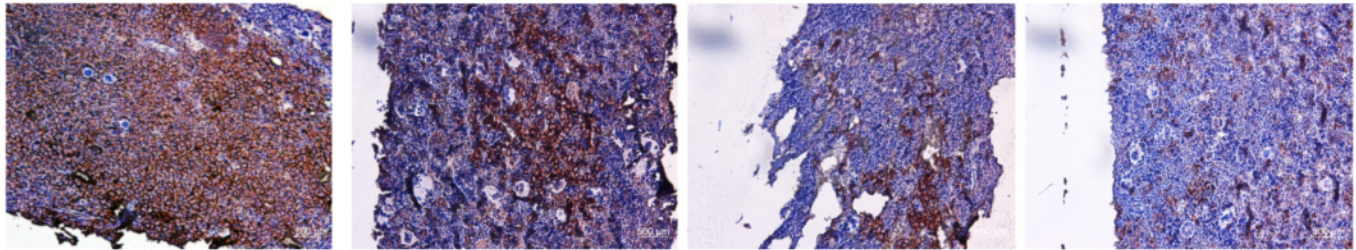

b

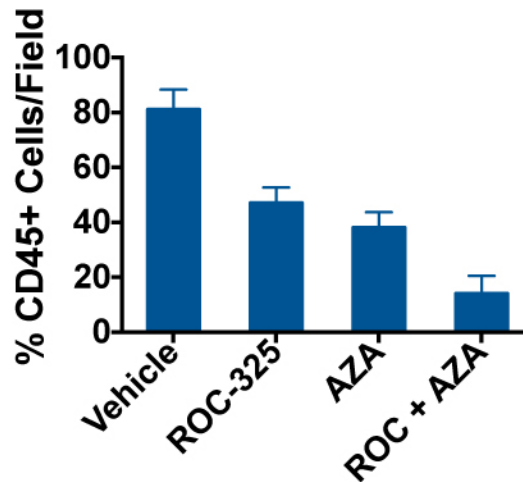

**Supplemental Figure 7. Engraftment efficiency of MV4-11 cells.** (a) Bone marrow specimens from each treatment group were stained with a human-specific anti-CD45 antibody. CD45 expression was visualized by immunohistochemistry as detailed in the Materials and Methods. (b) Quantification of CD45 positivity. The percentages of CD45+ cells per field were scored for each treatment group. N = 5 ± SD.
