# Supplementary material
Source: PubMed Central journal article supplement (PMC7462348)
Supplement: NIHMS1604849-supplement-1604849_Sup_Fig_8.pdf [file NIHMS1604849-supplement-1604849_Sup_Fig_8.pdf]

## Supplemental Figure 8

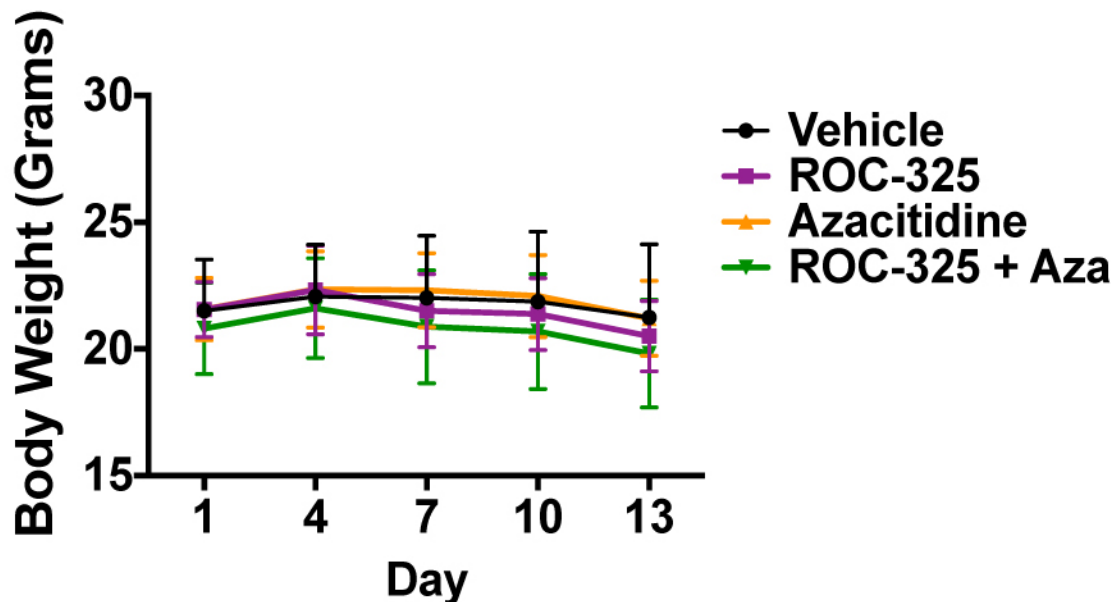

**Supplemental Figure 8. The combination of ROC-325 and azacitidine is well tolerated.** Body weight measurements are shown for all animals (N = 10 per group) from the start of dosing until the first vehicle control animals began to reach their study endpoint based on their health status. The combination did not induce significantly greater weight loss compared to single agent treatment groups.
