# Supplementary material
Source: PubMed Central journal article supplement (PMC7462348)
Supplement: NIHMS1604849-supplement-1604849_Sup_Fig_9.pdf [file NIHMS1604849-supplement-1604849_Sup_Fig_9.pdf]

# Supplemental Figure 9

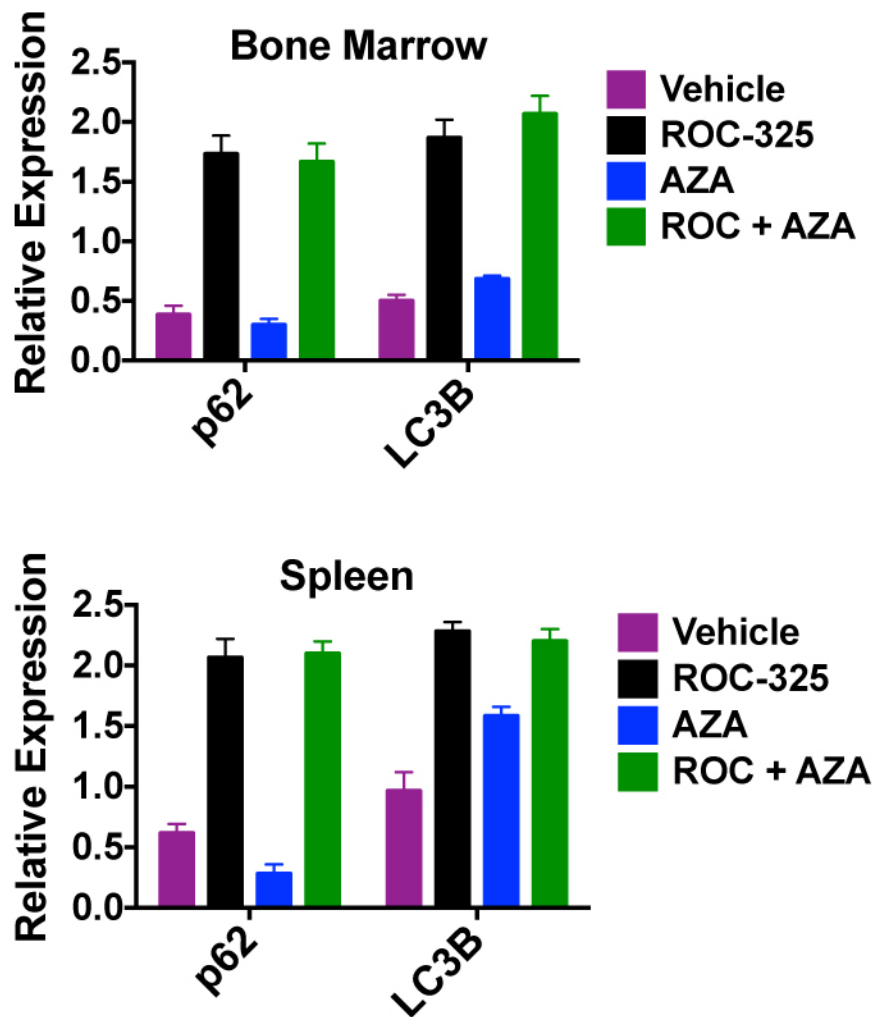

**Supplemental Figure 9. Quantification of p62 and LC3B immunohistochemistry.** Levels of LC3B and p62 in the bone marrow and spleen were measured by immunohistochemistry. Relative expression was quantified using ImageJ software. N = 3 ± SD.
